# Supplementary material
Source: publisher site journal article supplement (https://www.spandidos-publications.com/680/downloadSupplementary)
Supplement: Supplementary file 1 [file downloadSupplementary]

## Sheet: Sheet1
Quantitative and statistical analysis of target peptide and protein
Peptide Sequence	Protein Name	C_mean	ACBP_mean	ACBP-OXA_mean	OXA_mean	Ratio_ACBP/C	Ratio_ACBP-OXA/C	Ratio_OXA/C	TTEST_ACBP/C	TTEST_ACBP-OXA/C	TTEST_OXA/C
SSDQPLTVPVSPK	Q9ULW0	0.0754	0.1326	0.0395	0.1297	1.76	0.52	1.72	0.03415	0.13612	0.22252
DPQTPVLQTK	Q9ULW0	0.0221	0.0657	0.0108	0.0548	2.97	0.49	2.47	0.00042	0.03008	0.07796
LSVASTPISQR	A8K4B4	0.0335	0.1656	0.0205	0.0661	4.95	0.61	1.97	0.0004	0.31784	0.20261
HVDYVADQIVTK	P11388	0.1362	0.2487	0.121	0.1476	1.83	0.89	1.08	0.04032	0.76786	0.84153
AANILVGENLVCK	B2RA70	0.0958	0.1577	0.0908	0.0775	1.65	0.95	0.81	0.12355	0.91404	0.66608
AQFDTLQK	B2RA70	0.0316	0.0471	0.0271	0.2317	1.49	0.86	7.33	0.29549	0.76423	0.08415
ESADGLQGETQLLVSR	P46013	0.0352	0.093	0.0273	0.0533	2.64	0.77	1.51	0.00934	0.55046	0.3729
SPPPESVDTPTSTK	P46013	0.0153	0.0421	0.0155	0.019	2.75	1.01	1.24	0.00139	0.95276	0.50707
ELFQTPGHTEEAVAAGK	P46013	0.0564	0.1498	0.0441	0.0645	2.66	0.78	1.14	0.00575	0.54548	0.78181
DLFVELK	O75487	0.4369	0.6705	0.4233	0.4868	1.53	0.97	1.11	0.1536	0.94407	0.82274
DSPSAPVNVTVR	IS_HEAVY PEPTIDE	1	1	1	1	1	1	1	#DIV/0!	#DIV/0!	#DIV/0!
